# Supplementary material for: Genomic Diversity and Hotspot Mutations in 30,983 SARS-CoV-2 Genomes: Moving Toward a Universal Vaccine for the “Confined Virus”?
Source: MDPI journal article supplement (doi:10.3390/pathogens9100829), 2020-10-10
Supplement: s1 [file s1]

Color Key

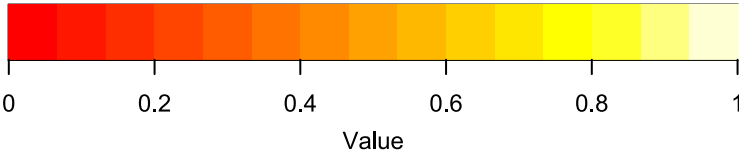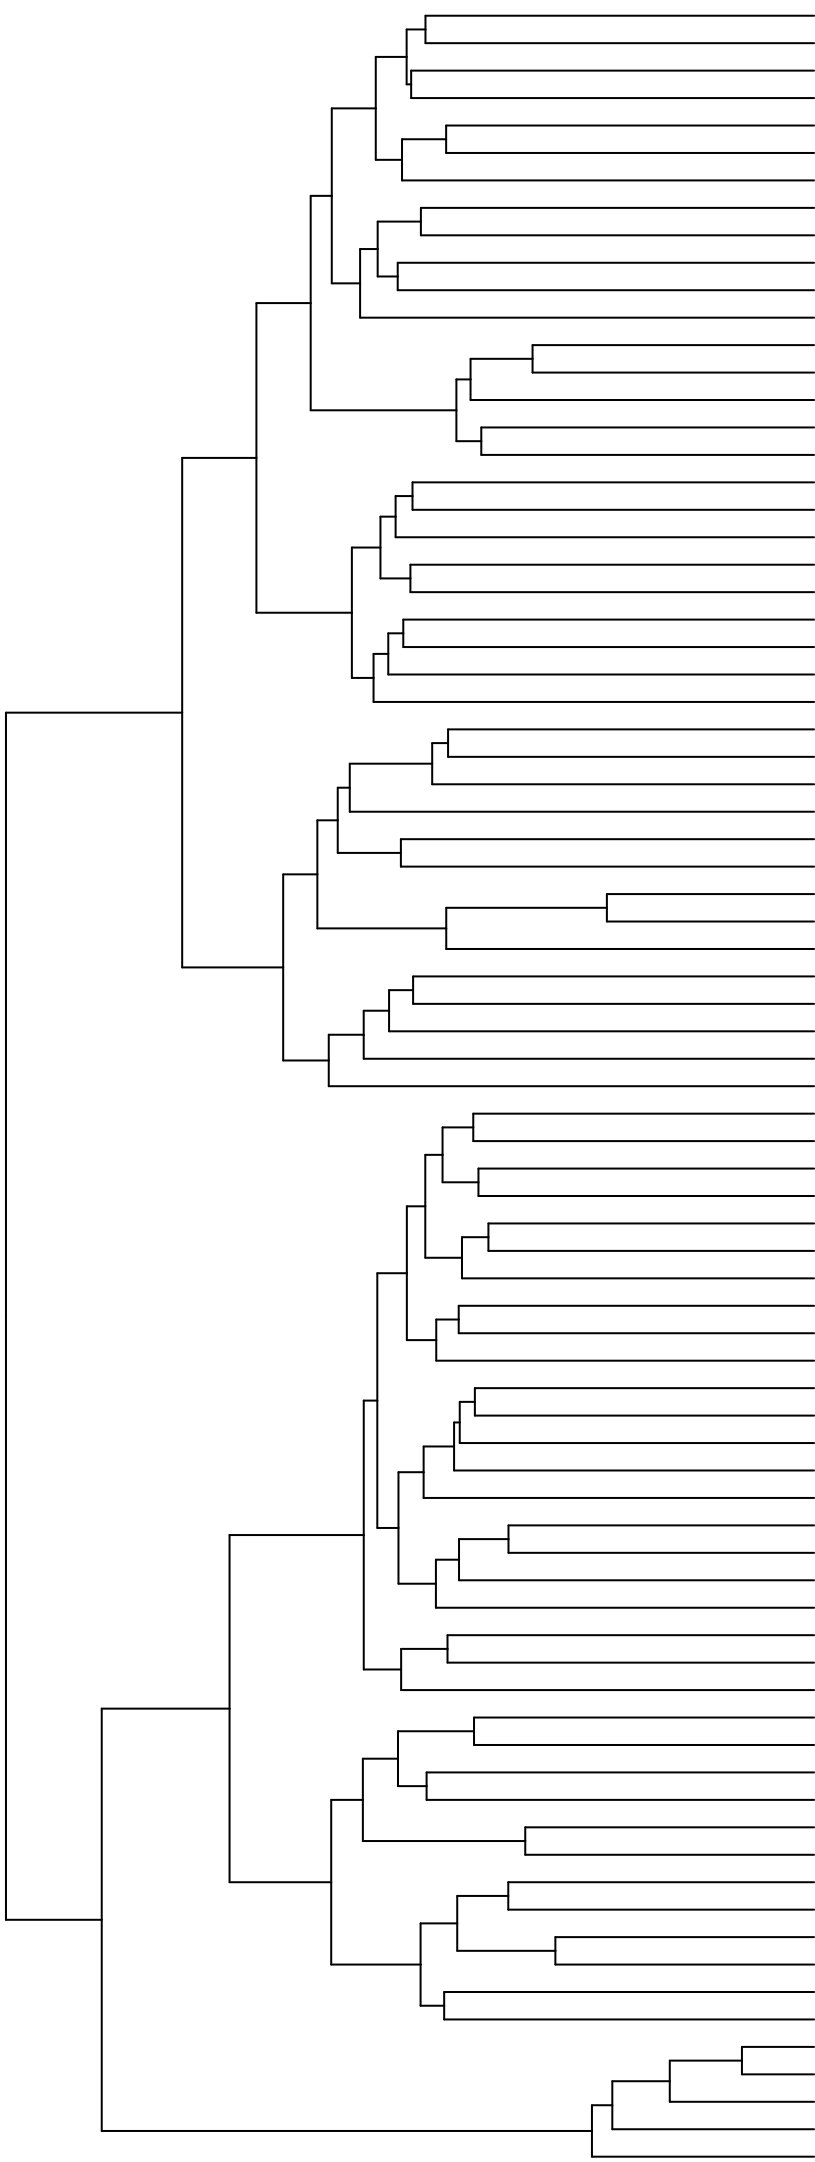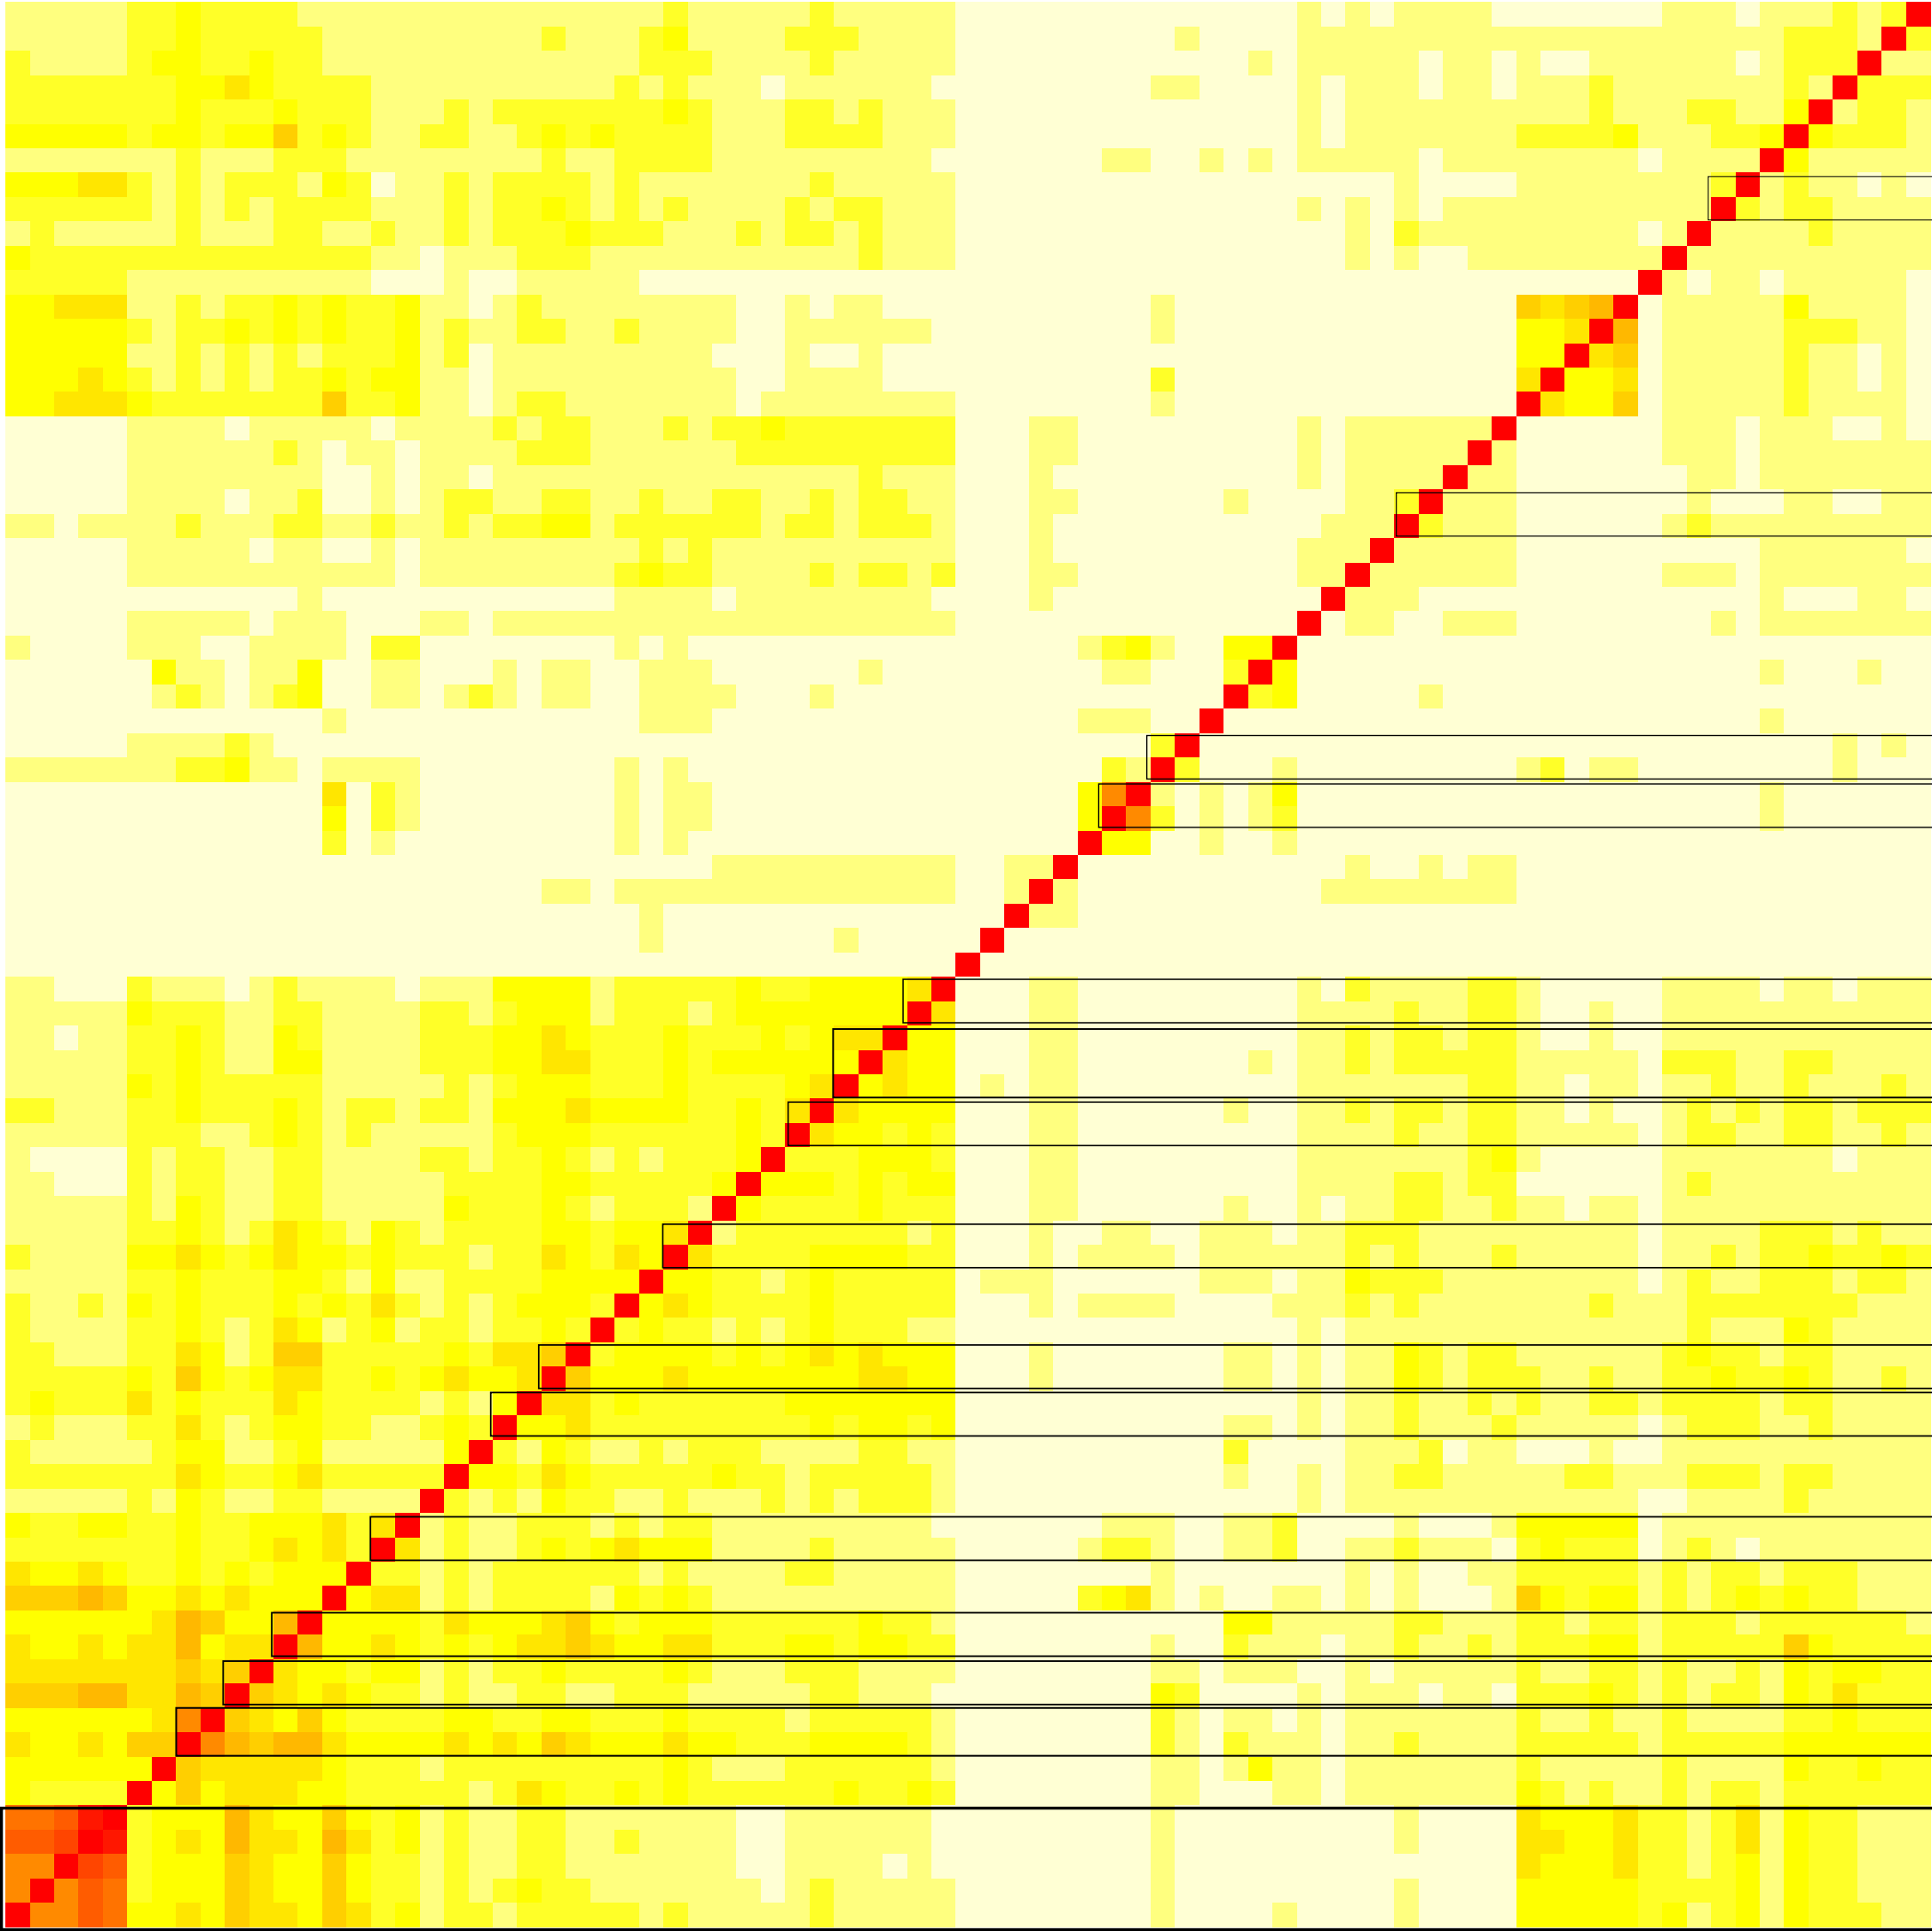

|                      |       |
|----------------------|-------|
| Uganda               |       |
| United Arab Emirates |       |
| Hong Kong            |       |
| Lebanon              |       |
| Japan                |       |
| Bangladesh           |       |
| Saudi Arabia         |       |
| Hungary              | SC-12 |
| Latvia               |       |
| Argentina            |       |
| Italy                |       |
| Ecuador              |       |
| Egypt                |       |
| Indonesia            |       |
| Romania              |       |
| Algeria              |       |
| Slovakia             |       |
| France               |       |
| Sweden               |       |
| DRC                  |       |
| Chile                | SC-13 |
| Brazil               |       |
| India                |       |
| Taiwan               |       |
| China                |       |
| Turkey               |       |
| Korea                |       |
| Scotland             |       |
| Uruguay              |       |
| Malaysia             |       |
| Iran                 | SC-14 |
| Pakistan             |       |
| Brunei               | SC-1  |
| Guam                 |       |
| Philippines          |       |
| United Kingdom       |       |
| Australia            |       |
| USA                  |       |
| South Africa         |       |
| Nepal                |       |
| Iceland              | SC-10 |
| Denmark              |       |
| Netherlands          | SC-15 |
| Belgium              |       |
| Austria              |       |
| Germany              | SC-11 |
| Russia               |       |
| Luxembourg           |       |
| Switzerland          |       |
| Spain                |       |
| Singapore            | SC-7  |
| Thailand             |       |
| Canada               |       |
| Israel               |       |
| Ghana                |       |
| Greece               | SC-6  |
| Portugal             |       |
| Finland              | SC-8  |
| Poland               |       |
| Mexico               |       |
| Colombia             |       |
| Senegal              |       |
| Slovenia             | SC-9  |
| Jamaica              |       |
| Czech Republic       |       |
| Gambia               |       |
| Vietnam              | SC-4  |
| Jordan               |       |
| Sri Lanka            | SC-5  |
| Kuwait               |       |
| Kazakhstan           | SC-2  |
| Georgia              |       |
| New Zealand          |       |
| Norway               |       |
| Nigeria              | SC-3  |
| Serbia               |       |
| Peru                 |       |
| Croatia              |       |
| Ireland              |       |

Cluster 1

Cluster 2
